# Supplementary material for: 绿色植物对室内空气中甲醛、苯、甲苯净化效果研究
Source: MDPI journal article supplement (doi:10.3390/molecules28083347), 2009-01-01
Supplement: s1 [file s1]

# Outstanding Electrochemical Performance of Ni-Rich Concentration-Gradient Cathode Material $\text{LiNi}_{0.9}\text{Co}_{0.083}\text{Mn}_{0.017}\text{O}_2$ for Lithium-Ion Batteries

Hechen Li <sup>1</sup>, Yiwen Guo <sup>1</sup>, Yuanhua Chen <sup>2,3,\*</sup>, Nengshuang Gao <sup>1</sup>, Ruicong Sun <sup>1</sup>, Yachun Lu <sup>1</sup> and Quanqi Chen <sup>1,3,\*</sup>

<sup>1</sup> Guangxi Key Laboratory of Electrochemical and Magneto-Chemical Functional Materials, College of Chemistry and Bioengineering, Guilin University of Technology, Guilin 541004, China

<sup>2</sup> College of Mechanical and Vehicle Engineering, Hunan University, Changsha 410082, China

<sup>3</sup> School of Automobile Engineering, Guilin University of Aerospace Technology, Guilin 541004, China

\* Correspondence: cyh@guat.edu.cn (Y.C.); quanqi.chen@glut.edu.cn (Q.C.)

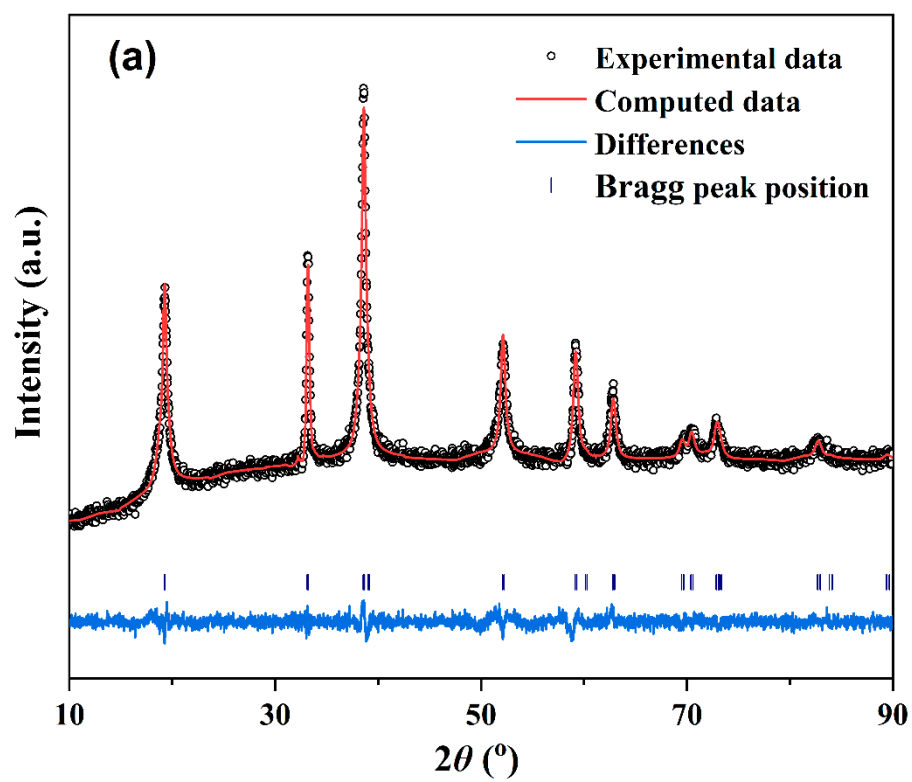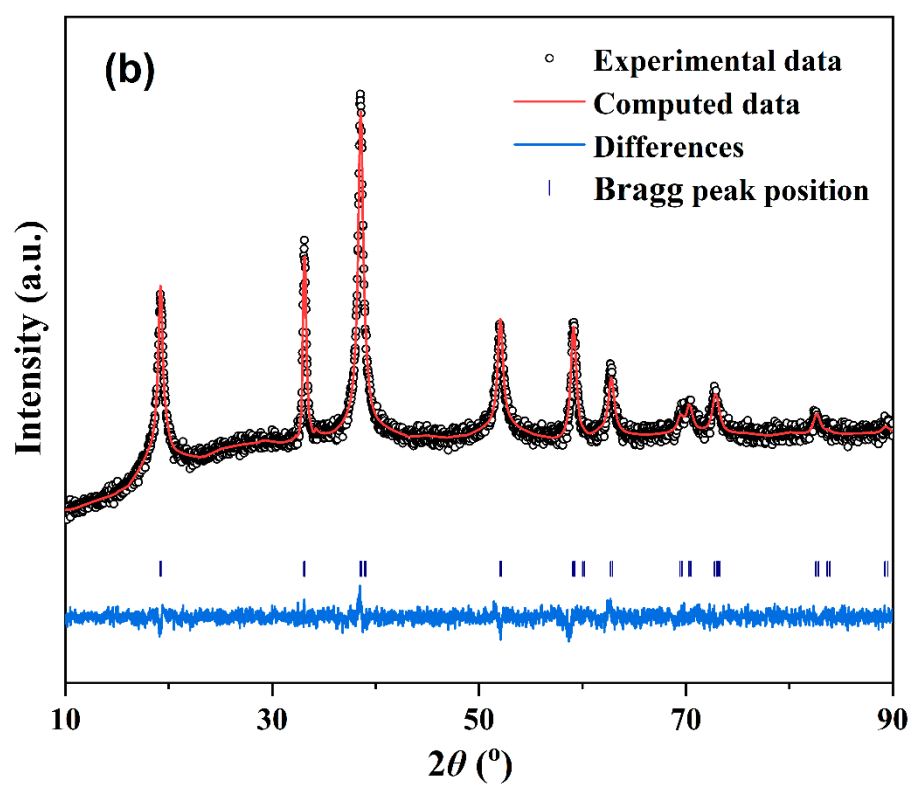

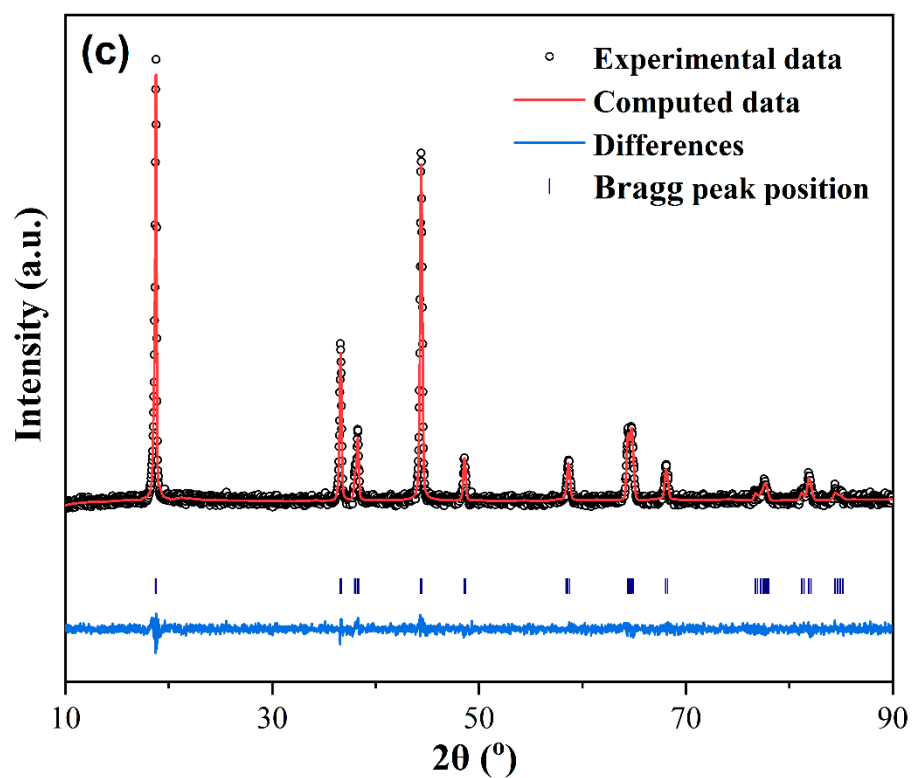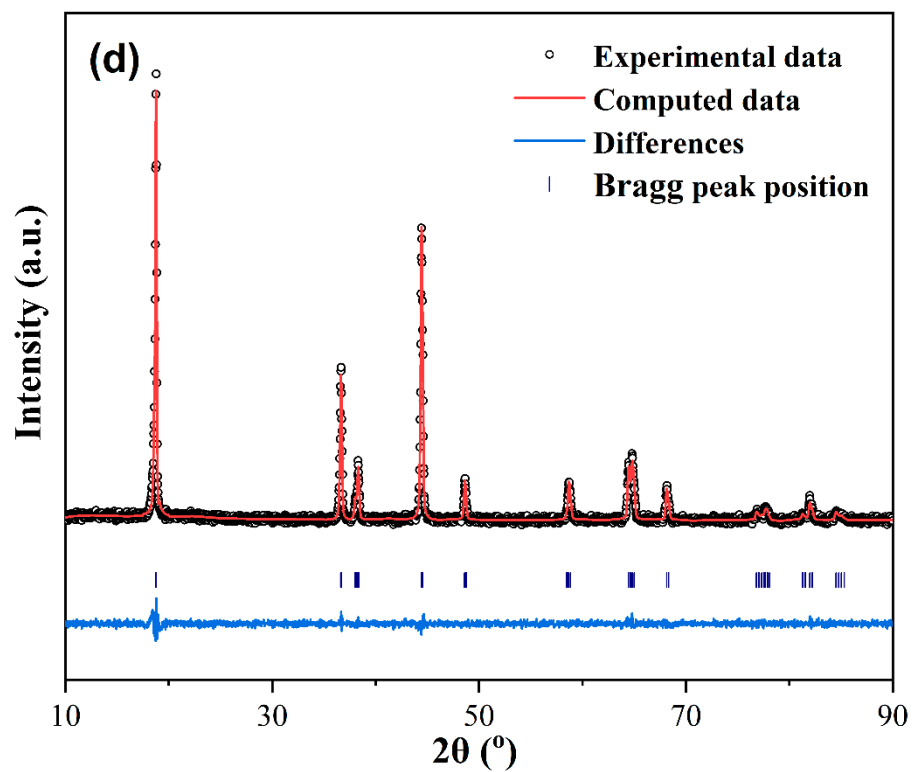

**Figure S1.** Refine XRD patterns of (a) CC-NCMOH, (b) CG-NCMOH, (c) CC-LNCM and (d) CG-LNCM.

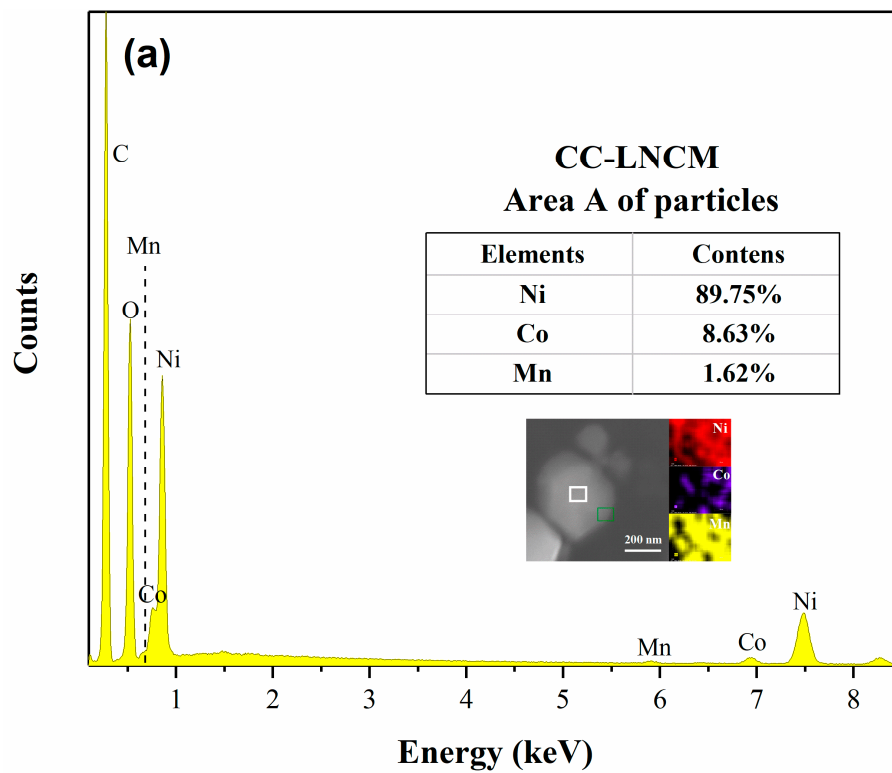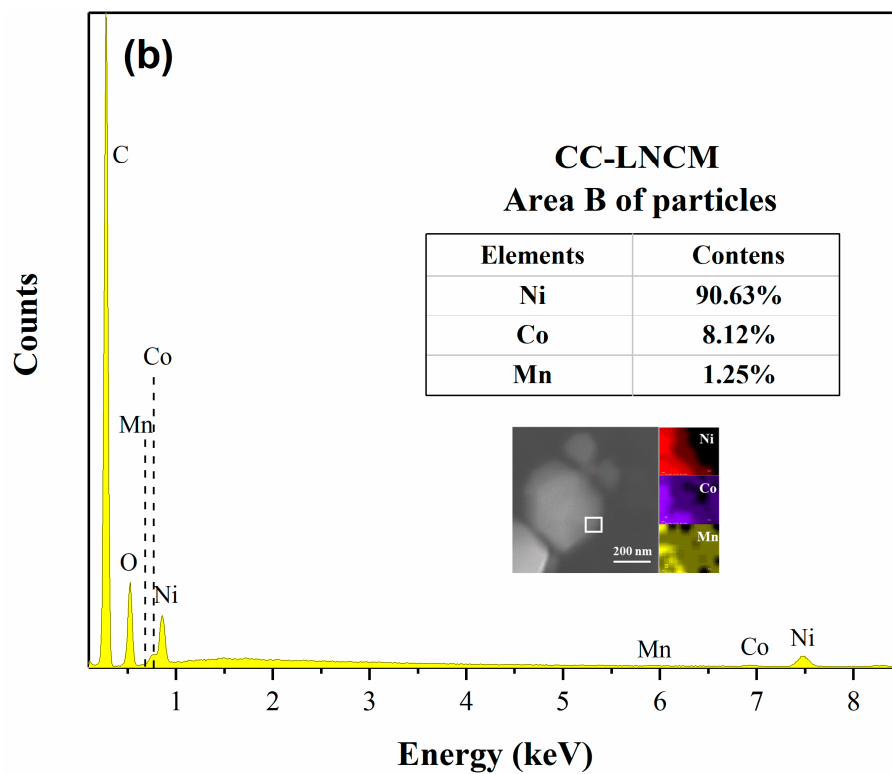

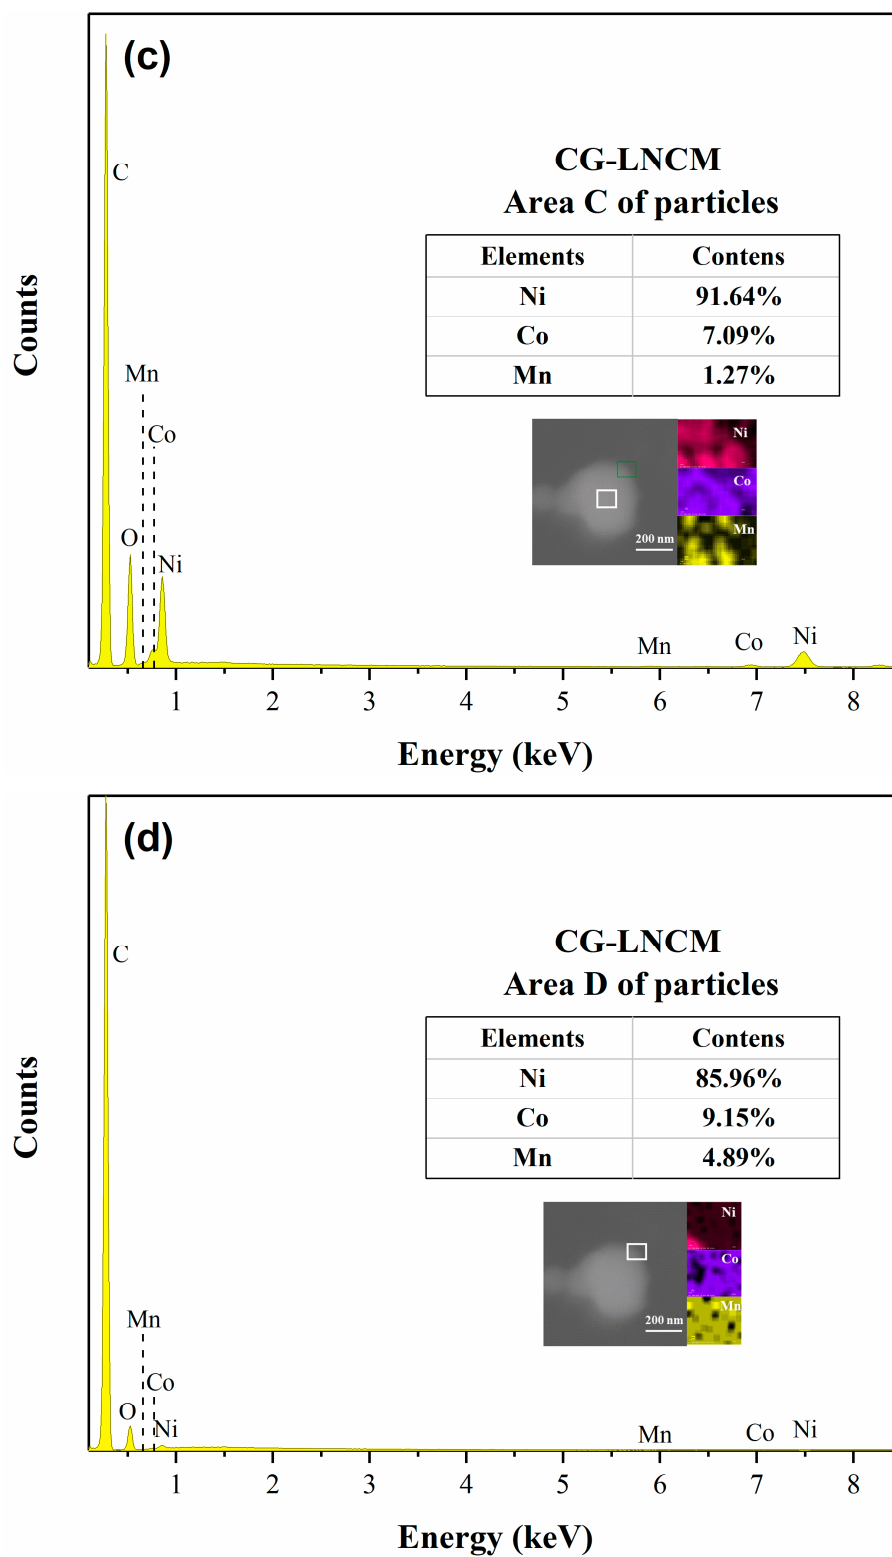

**Figure S2.** The EDX graph of **(a)** area A and **(b)** area B of CC-LNCM, **(c)** area C and **(d)** area D of CG-LNCM.

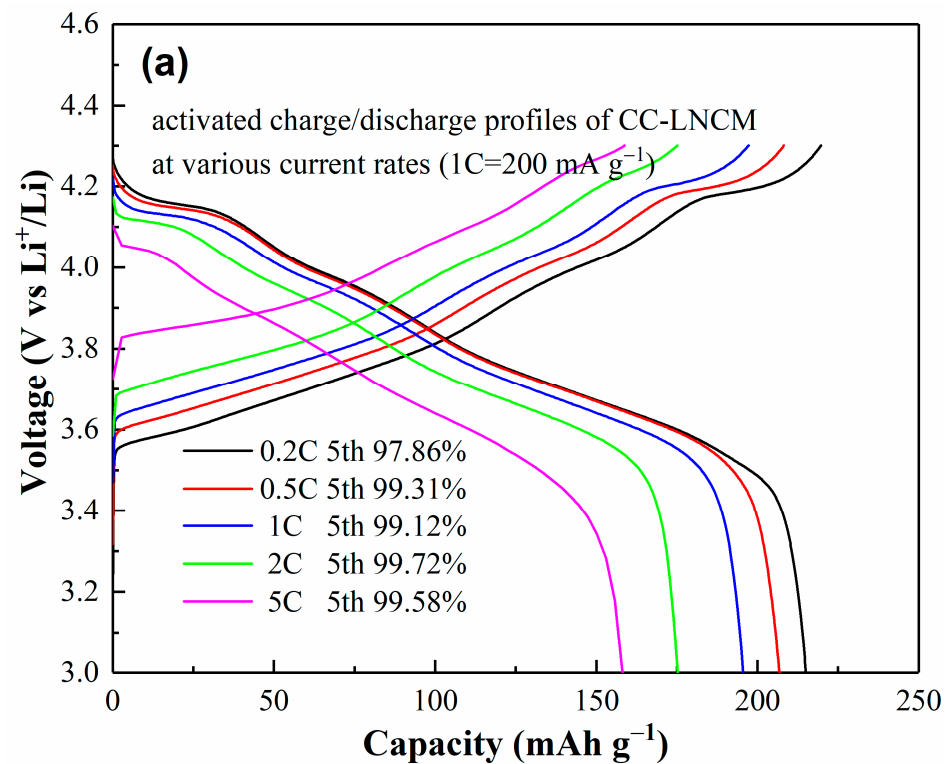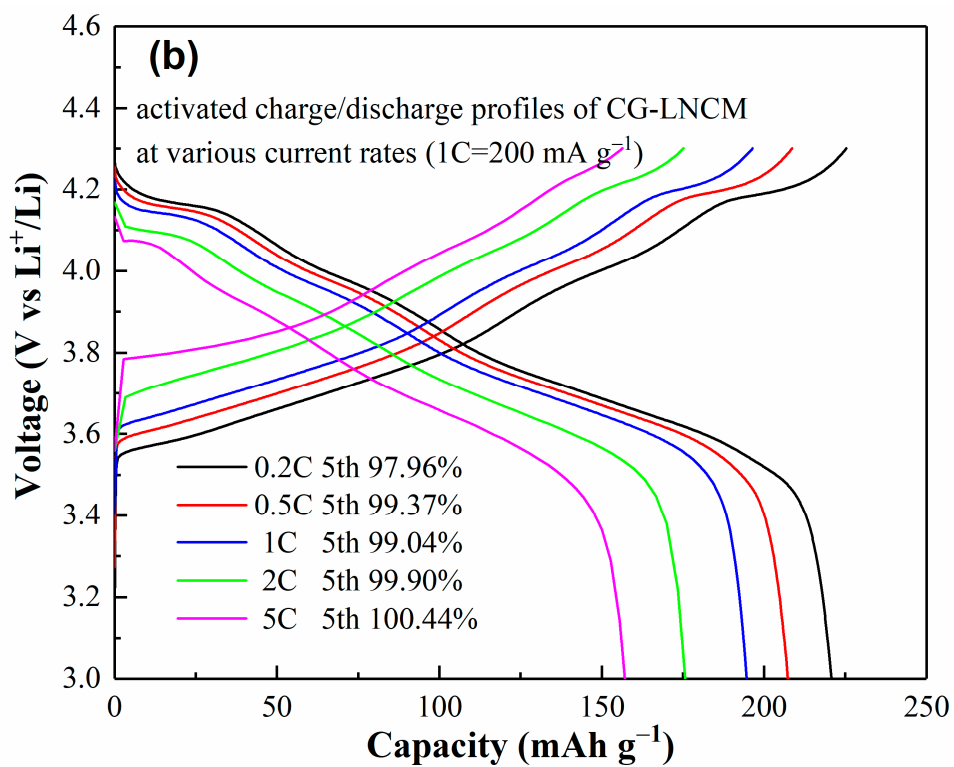

**Figure S3.** Activated charge/discharge profiles of **(a)** CC-LNCM and **(b)** CG-LNCM at various current rates.

**Table S1** Cell parameters of as-prepared samples

| sample   | $a/\text{\AA}$ | $b/\text{\AA}$ | $c/\text{\AA}$ | $c/a$ | $I_{(003)}/I_{(104)}$ |
|----------|----------------|----------------|----------------|-------|-----------------------|
| CC-NCMOH | 3.12171        | 3.12171        | 4.61164        | /     |                       |
| CG-NCMOH | 3.12407        | 3.12407        | 4.61924        | /     |                       |
| CC-LNCM  | 2.8738         | 2.8738         | 14.1914        | 4.94  | 1.220                 |
| CG-LNCM  | 2.8775         | 2.8775         | 14.2059        | 4.94  | 1.395                 |

**Table S2** Atomic parameters of as-prepared samples

| sample   | atom | Wyckoff site | x       | y       | z       | occupation |
|----------|------|--------------|---------|---------|---------|------------|
| CC-NCMOH | Ni1  | 1a           | 0       | 0       | 0       | 0.900      |
|          | Co1  | 1a           | 0       | 0       | 0       | 0.083      |
|          | Mn1  | 1a           | 0       | 0       | 0       | 0.017      |
|          | O1   | 2d           | 0.33333 | 0.66667 | 0.23281 | 1.000      |
|          | H1   | 2d           | 0.33333 | 0.66667 | 0.43211 | 1.000      |
| CG-NCMOH | Ni1  | 1a           | 0       | 0       | 0       | 0.900      |
|          | Co1  | 1a           | 0       | 0       | 0       | 0.083      |
|          | Mn1  | 1a           | 0       | 0       | 0       | 0.017      |
|          | O1   | 2d           | 0.33333 | 0.66667 | 0.23417 | 1.000      |
|          | H1   | 2d           | 0.33333 | 0.66667 | 0.43201 | 1.000      |
| CC-LNCM  | Li1  | 3b           | 0       | 0       | 0.5     | 0.939      |
|          | Ni2  | 3b           | 0       | 0       | 0.5     | 0.061      |
|          | Co1  | 3a           | 0       | 0       | 0       | 0.083      |
|          | Mn1  | 3a           | 0       | 0       | 0       | 0.017      |
|          | Ni1  | 3a           | 0       | 0       | 0       | 0.839      |
|          | Li2  | 3a           | 0       | 0       | 0       | 0.061      |
|          | O1   | 6c           | 0       | 0       | 0.25610 | 1.000      |
| CG-LNCM  | Li1  | 3b           | 0       | 0       | 0.5     | 0.947      |
|          | Ni2  | 3b           | 0       | 0       | 0.5     | 0.053      |
|          | Co1  | 3a           | 0       | 0       | 0       | 0.083      |
|          | Mn1  | 3a           | 0       | 0       | 0       | 0.017      |
|          | Ni1  | 3a           | 0       | 0       | 0       | 0.847      |
|          | Li2  | 3a           | 0       | 0       | 0       | 0.053      |
|          | O1   | 6c           | 0       | 0       | 0.25820 | 1.000      |

**Table S3** The fitting results of fresh electrodes and electrodes after cycled for 100 cycles at 5C.

| electrode                | $R_f (\Omega)$ | $R_{ct} (\Omega)$ |
|--------------------------|----------------|-------------------|
| fresh CC-LNCM electrode  | —              | 62.9              |
| fresh CG-LNCM electrode  | —              | 48.0              |
| cycled CC-LNCM electrode | 109.6          | 253.0             |
| cycled CG-LNCM electrode | 44.2           | 186.9             |
